# Supplementary material
Source: publisher figshare collection journal article supplement (https://frontiersin.figshare.com/ndownloader/files/14063246)
Supplement: Supplementary file [file 14063246]

**Supplementary Table S1: Primer sequences**

| Target gene                                                      | Forward primer (5'-3')           | Reverse primer (5'-3')              |
|------------------------------------------------------------------|----------------------------------|-------------------------------------|
| <i>Primers for qPCR</i>                                          |                                  |                                     |
| Mouse <i>Bcl6</i>                                                | CCCCGGCTGACAGCTGTAT              | ATGACAACGTCCGTCAAGATGT              |
| Human <i>BCL6</i>                                                | GCCAGTCCCTGGTGAGTACAG            | TGCATARCACTTCGTGCCTCTT              |
| <i>Il-6</i>                                                      | TGGTGACAACCACGGCCTTCC            | AAGCCTCCGACTTGTGAAGTGGT             |
| Mouse <i>Tnf-α</i>                                               | CCTCCTGGCCAACGGCATGG             | TCGGCTGACGGTGTGGGTGA                |
| Human <i>TNF-α</i>                                               | TCCTTCAGACACCCTCAACC             | AGGCCCCAGTTTGAATTCTT                |
| <i>Il-12</i>                                                     | AGAGTTTCTAGATGCTGGCCAGTAC        | TTGTGGAGCAGCAGATGTGAGT              |
| <i>Il-17d</i>                                                    | TTGTAGTGCTCAGATGAACTTCCTTCT      | CCAGATCCGGAGCACTCATT                |
| <i>Il-23a</i>                                                    | CCACAAGGACTCAAGGACAACAG          | CCCCTTTGAAGATGTCAGAGTCA             |
| Mouse <i>Cxcl9</i>                                               | GATCAAACCTGCCTAGATCC             | GGCTGTGTAGAACACAGAGT                |
| Mouse <i>Cxcl10</i>                                              | CGCTGAGAGACATCCCGAGC             | TGCTGTCCATCACAGCACCG                |
| Human <i>CXCL9</i>                                               | CCACCTACAATCCTTGAAAGACCTTA       | GACATGTTTGAAGTCCATTCTTCAGT          |
| Human <i>CXCL10</i>                                              | CAATTTTGTCCACGTGTTGAGATC         | CTTTTCCTTGCTAACTGCTTTCA             |
| <i>GAPDH</i>                                                     | GTATTGGGCGCCTGGTCACC             | CGCTCCTGGAAGATGGTGATGG              |
| β-actin                                                          | GATCTGGCACCAACACCTTCT            | CTTTTCACGGTTGGCCTTAG                |
| HBV detection                                                    | CAGCTTGGAGGCTTGAACAGT            | AGGAGGCTGTAGGCATAAATTGG             |
| HBV Core promoter                                                | CCAAGGTCTTGCATAAGAGGA            | CCAAGTCTCCCACTCAGTAAA               |
| HBV pre-S1 promoter                                              | TGCCCTTAGATAAAGGGATCAA           | ATACCCGCCTTCCAAAGAGT                |
| HBV pre-S2 promoter                                              | CTCCTCATGGGGGACTGTT              | GTAGGCTGCCTTCCTGACTG                |
| HBV X promoter                                                   | TCTGAACCTTTACCCCGTTG             | GAGTTCCGCAGTATGGATCG                |
| <i>Primers for the probe used for Southern and Northern blot</i> |                                  |                                     |
| HBx probe                                                        | CCGCTCGAGCCATGGCTGCTAGGCTGT<br>C | CATGCCATGGTGGCAGAGGTGAAAAAG<br>TTGC |

## Core promoter and downstream regions

|                                                                              |   |          |             |             |             |             |            |             |            |            |            |            |  |      |  |  |  |  |  |  |  |  |  |  |  |
|------------------------------------------------------------------------------|---|----------|-------------|-------------|-------------|-------------|------------|-------------|------------|------------|------------|------------|--|------|--|--|--|--|--|--|--|--|--|--|--|
| Genotype                                                                     | A | 1551     |             |             |             |             |            |             |            |            |            |            |  | 1650 |  |  |  |  |  |  |  |  |  |  |  |
|                                                                              |   | AY707087 | ccgtctgtgc  | cttctcatct  | gccggtccgt  | gtgcaacttcg | cttcaactct | gcacgttgca  | tggagaccac | cgtgaacgcc | catcagatcc | tgcccaaggt |  |      |  |  |  |  |  |  |  |  |  |  |  |
|                                                                              |   | AB116079 | ccgtctgtgc  | cttctcatct  | gccggtccgt  | gtgcaacttcg | cttcaactct | gcacgttgca  | tggcgaccac | cgtgaacgcc | catcagatcc | tgcccaaggt |  |      |  |  |  |  |  |  |  |  |  |  |  |
|                                                                              |   | B6_2     | ccgtctgtgc  | cttctcatcc  | acccgaccctg | gtgcaacttcg | cttcaactct | gcacgttcgca | tgggaaccac | cgtgaacgcc | caccggaacc | tgcccaaggt |  |      |  |  |  |  |  |  |  |  |  |  |  |
|                                                                              |   | AB287326 | ccgtctgtgc  | cttctcatct  | gccggaccctg | gtgcaacttcg | cttcaactct | gcacgttgca  | tggagaccac | cgtgaacgcc | caccggaacc | tgcccaaggt |  |      |  |  |  |  |  |  |  |  |  |  |  |
| Genotype                                                                     | B | 1551     |             |             |             |             |            |             |            |            |            |            |  | 1650 |  |  |  |  |  |  |  |  |  |  |  |
|                                                                              |   | GQ377528 | ccgtctgtgc  | cttctcatct  | gccggaccctg | gtgcaacttcg | cttcaactct | gcacgttgca  | tggagaccac | cgtgaacgcc | caccggaacc | tgcccaaggt |  |      |  |  |  |  |  |  |  |  |  |  |  |
|                                                                              |   | GQ358158 | ccgtctgtgc  | cttctcatct  | gccggtccgt  | gtgcaacttcg | cttcaactct | gcacgttgca  | tggagaccac | cgtgaacgcc | caccggaacc | tgcccaaggt |  |      |  |  |  |  |  |  |  |  |  |  |  |
|                                                                              |   | AF121240 | ccgtctgtgc  | cttctcatct  | gccggaccctg | gtgcaacttcg | cttcaactct | gcacgttcgca | tggagaccac | cgtgaacgcc | caccggaacc | tgcccaaggt |  |      |  |  |  |  |  |  |  |  |  |  |  |
|                                                                              |   | AB109475 | ccgtctgtgc  | cttctcatct  | gccggaccctg | gtgcaacttcg | cttcaactct | gcacgttcgca | tggagaccac | cgtgaacgcc | caccatctct | tgcccaaggt |  |      |  |  |  |  |  |  |  |  |  |  |  |
| BCL6 binding motif                                                           |   |          |             |             |             |             |            |             |            |            |            |            |  |      |  |  |  |  |  |  |  |  |  |  |  |
| Genotype                                                                     | A | 1651     |             |             |             |             |            |             |            |            |            |            |  | 1750 |  |  |  |  |  |  |  |  |  |  |  |
|                                                                              |   | AY707087 | cttacataag  | aggactcttg  | gactccacagc | aattgtcaacg | accgaccttg | aggcctactt  | caaagactgt | gtgtttaagc | actgggagga | gctgggggag |  |      |  |  |  |  |  |  |  |  |  |  |  |
|                                                                              |   | AB116079 | cttacataag  | aggactcttg  | gactccacagc | aattgtcaacg | accgaccttg | aggcctactt  | caaagactgt | gtgtttaagc | actgggagga | gctgggggag |  |      |  |  |  |  |  |  |  |  |  |  |  |
|                                                                              |   | B6_2     | cttgcataag  | aggactcttg  | gactctcaagc | aattgtcaacg | accgaccttg | aggcctactt  | caaagactgt | gtgtttaagc | actgggagga | gctgggggag |  |      |  |  |  |  |  |  |  |  |  |  |  |
|                                                                              |   | AB287326 | cttgcataag  | aggactcttg  | gactctcaagc | aattgtcaacg | accgaccttg | aggcctactt  | caaagactgt | gtgtttaagc | actgggagga | gctgggggag |  |      |  |  |  |  |  |  |  |  |  |  |  |
| Genotype                                                                     | C | 1651     |             |             |             |             |            |             |            |            |            |            |  | 1750 |  |  |  |  |  |  |  |  |  |  |  |
|                                                                              |   | GQ377528 | cttacataag  | aggactcttg  | gactctcaagc | aattgtcaacg | accgaccttg | aggcctactt  | caaagactgt | gtgtttaagc | actgggagga | gctgggggag |  |      |  |  |  |  |  |  |  |  |  |  |  |
|                                                                              |   | GQ358158 | cttacataag  | aggactcttg  | gactctcaagc | aattgtcaacg | accgaccttg | aggcctactt  | caaagactgt | gtgtttaagc | actgggagga | gctgggggag |  |      |  |  |  |  |  |  |  |  |  |  |  |
|                                                                              |   | AF121240 | cttacataag  | aggactcttg  | gactctctgt  | aattgtcaacg | accgaccttg | aggcctactt  | caaagactgt | gtgtttaagc | actgggagga | gctgggggag |  |      |  |  |  |  |  |  |  |  |  |  |  |
|                                                                              |   | AB109475 | cttacataag  | aggactcttg  | gactctctgt  | aattgtcaacg | accgaccttg | aggcctactt  | caaagactgt | gtgtttaagc | actgggagga | gctgggggag |  |      |  |  |  |  |  |  |  |  |  |  |  |
| <div><div>+1</div><div>PreCore</div><div>+1</div><div>Pregenomic</div></div> |   |          |             |             |             |             |            |             |            |            |            |            |  |      |  |  |  |  |  |  |  |  |  |  |  |
| Genotype                                                                     | A | 1751     |             |             |             |             |            |             |            |            |            |            |  | 1850 |  |  |  |  |  |  |  |  |  |  |  |
|                                                                              |   | AY707087 | gagattaggt  | taaaggtctt  | tgtattagga  | ggctgtaggc  | ataaattggt | ctgcgcacca  | gcaccatgca | actttttcac | ctctgcttaa | tcattctctt |  |      |  |  |  |  |  |  |  |  |  |  |  |
|                                                                              |   | AB116079 | gagattaggt  | taaaggtctt  | tgtattagga  | ggctgtaggc  | ataaattggt | ctgttcacca  | gcaccatgca | actttttcac | ctctgcttaa | tcattctctt |  |      |  |  |  |  |  |  |  |  |  |  |  |
|                                                                              |   | B6_2     | gagattaggt  | taaaggtctt  | tgtattagga  | ggctgtaggc  | ataaattggt | ctgttcacca  | gcaccatgca | actttttcac | ctctgcttaa | tcattctctt |  |      |  |  |  |  |  |  |  |  |  |  |  |
|                                                                              |   | AB287326 | gagattaggt  | taaaggtctt  | tgtattagga  | ggctgtaggc  | ataaattggt | ctgttcacca  | gcaccatgca | actttttcac | ctctgcttaa | tcattctctt |  |      |  |  |  |  |  |  |  |  |  |  |  |
| Genotype                                                                     | B | 1751     |             |             |             |             |            |             |            |            |            |            |  | 1850 |  |  |  |  |  |  |  |  |  |  |  |
|                                                                              |   | GQ377528 | gagattaggt  | taaaggtctt  | tgtattagga  | ggctgtaggc  | ataaattggt | ctgttcacca  | gcaccatgca | actttttcac | ctctgcttaa | tcattctctt |  |      |  |  |  |  |  |  |  |  |  |  |  |
|                                                                              |   | GQ358158 | gagattaggt  | taaaggtctt  | tgtattagga  | ggctgtaggc  | ataaattggt | ctgttcacca  | gcaccatgca | actttttcac | ctctgcttaa | tcattctctt |  |      |  |  |  |  |  |  |  |  |  |  |  |
|                                                                              |   | AF121240 | gagattaggt  | taaaggtctt  | tgtattagga  | ggctgtaggc  | ataaattggt | ctgcgcacca  | gcaccatgca | actttttcac | ctctgcttaa | tcattctctt |  |      |  |  |  |  |  |  |  |  |  |  |  |
|                                                                              |   | AB109475 | gagattaggt  | taaaggtctt  | tgtattagga  | ggctgtaggc  | ataaattggt | ctgcgcacca  | gcaccatgca | actttttcac | ctctgcttaa | tcattctctt |  |      |  |  |  |  |  |  |  |  |  |  |  |
| Genotype                                                                     | C | 1751     |             |             |             |             |            |             |            |            |            |            |  | 1850 |  |  |  |  |  |  |  |  |  |  |  |
|                                                                              |   | AY707087 | tacactgtccc | actgtgtcaag | ctcccaagct  | gtgccttggg  | tgaccttggg | gatggacat   | tgaccttat  | aaagaatttg | gagctactgt | ggagttactc |  |      |  |  |  |  |  |  |  |  |  |  |  |
|                                                                              |   | AB116079 | tacactgtccc | actgtgtcaag | ctcccaagct  | gtgccttggg  | tgaccttggg | gatggacat   | tgaccttat  | aaagaatttg | gagctactgt | ggagttactc |  |      |  |  |  |  |  |  |  |  |  |  |  |
|                                                                              |   | B6_2     | tctactgtcct | actgtgtcaag | ctcccaagct  | gtgccttggg  | tgaccttggg | gatggacat   | tgaccttat  | aaagaatttg | gagctctgtg | ggagttactc |  |      |  |  |  |  |  |  |  |  |  |  |  |
|                                                                              |   | AB287326 | tctactgtcct | actgtgtcaag | ctcccaagct  | gtgccttggg  | tgaccttggg | gatggacat   | tgaccttat  | aaagaatttg | gagctactgt | ggagttactc |  |      |  |  |  |  |  |  |  |  |  |  |  |
| Genotype                                                                     | D | 1751     |             |             |             |             |            |             |            |            |            |            |  | 1850 |  |  |  |  |  |  |  |  |  |  |  |
|                                                                              |   | GQ377528 | tctactgtcct | actgtgtcaag | ctcccaagct  | gtgccttggg  | tgaccttggg | gatggacat   | tgaccttat  | aaagaatttg | gagctctgtg | ggagttactc |  |      |  |  |  |  |  |  |  |  |  |  |  |
|                                                                              |   | GQ358158 | tctactgtcct | actgtgtcaag | ctcccaagct  | gtgccttggg  | tgaccttggg | gatggacat   | tgaccttat  | aaagaatttg | gagctctgtg | ggagttactc |  |      |  |  |  |  |  |  |  |  |  |  |  |
|                                                                              |   | AF121240 | tctactgtcct | actgtgtcaag | ctcccaagct  | gtgccttggg  | tgaccttggg | gatggacat   | tgaccttat  | aaagaatttg | gagctactgt | ggagttactc |  |      |  |  |  |  |  |  |  |  |  |  |  |
|                                                                              |   | AB109475 | tctactgtcct | actgtgtcaag | ctcccaagct  | gtgccttggg  | tgaccttggg | gatggacat   | tgaccttat  | aaagaatttg | gagctactgt | ggagttactc |  |      |  |  |  |  |  |  |  |  |  |  |  |

## Pre-S1 promoter and downstream regions

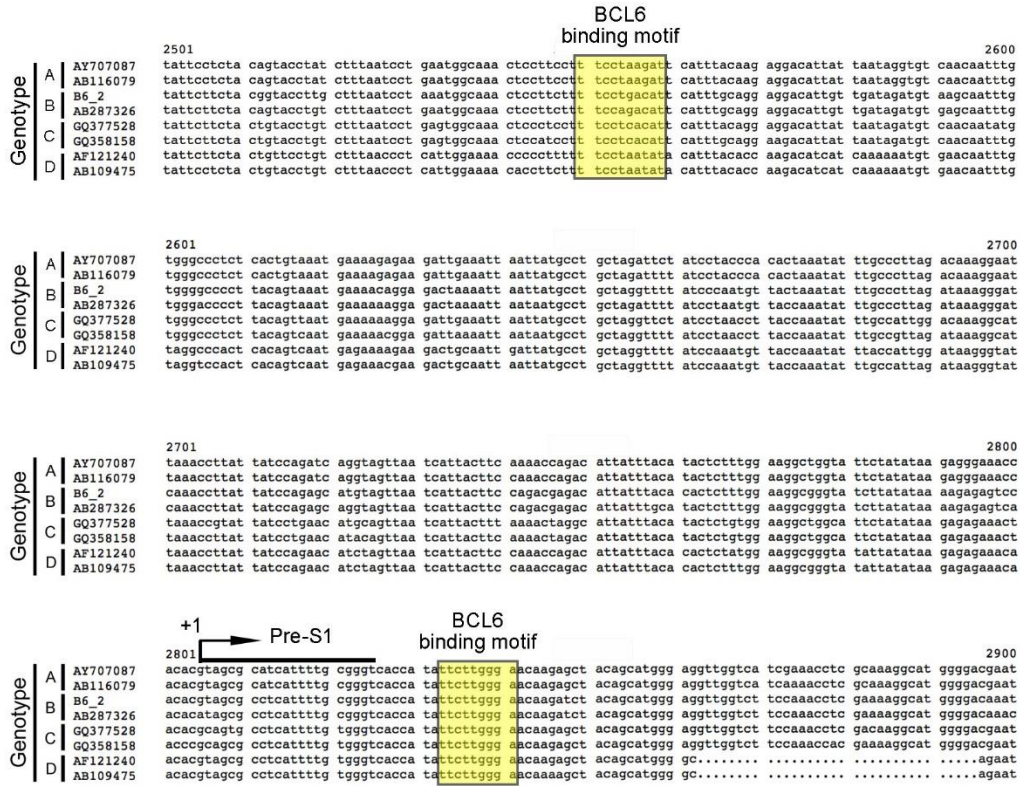

**Supplementary Figure S2.** The putative BCL6 binding sites were found in the pre-S1 promoter and downstream regions of four genotypes of HBV. The sequences in the pre-S1 promoter and downstream regions (nt 2501- nt 2900) of two representative clones for HBV genotypes A, B, C and D were extracted from NCBI data base and aligned. The putative BCL6 binding sites are indicated by the yellow boxes; +1 indicates the transcription start site.

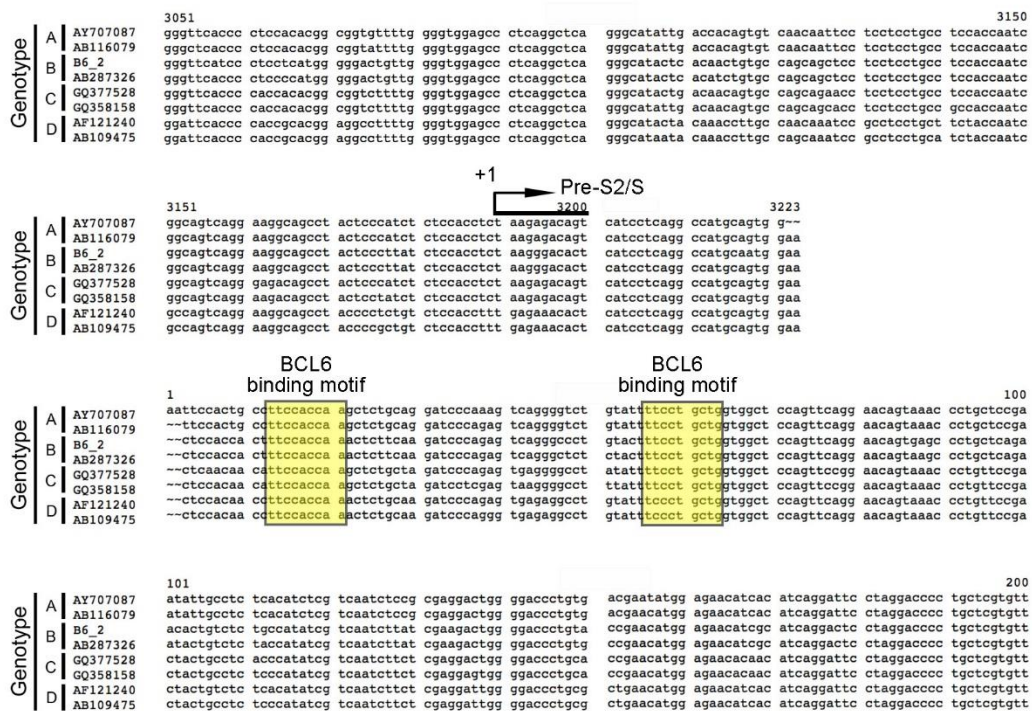

**Supplementary Figure S3.** The putative BCL6 binding sites were found in the pre-S2 promoter and downstream regions of four genotypes of HBV. The sequences in the pre-S2 promoter and downstream regions (nt 3051-nt 3223/1- nt 200) of two representative clones for HBV genotypes A, B, C and D were extracted from NCBI data base and aligned. The putative BCL6 binding sites are indicated by the yellow boxes; +1 indicates the transcription start site.



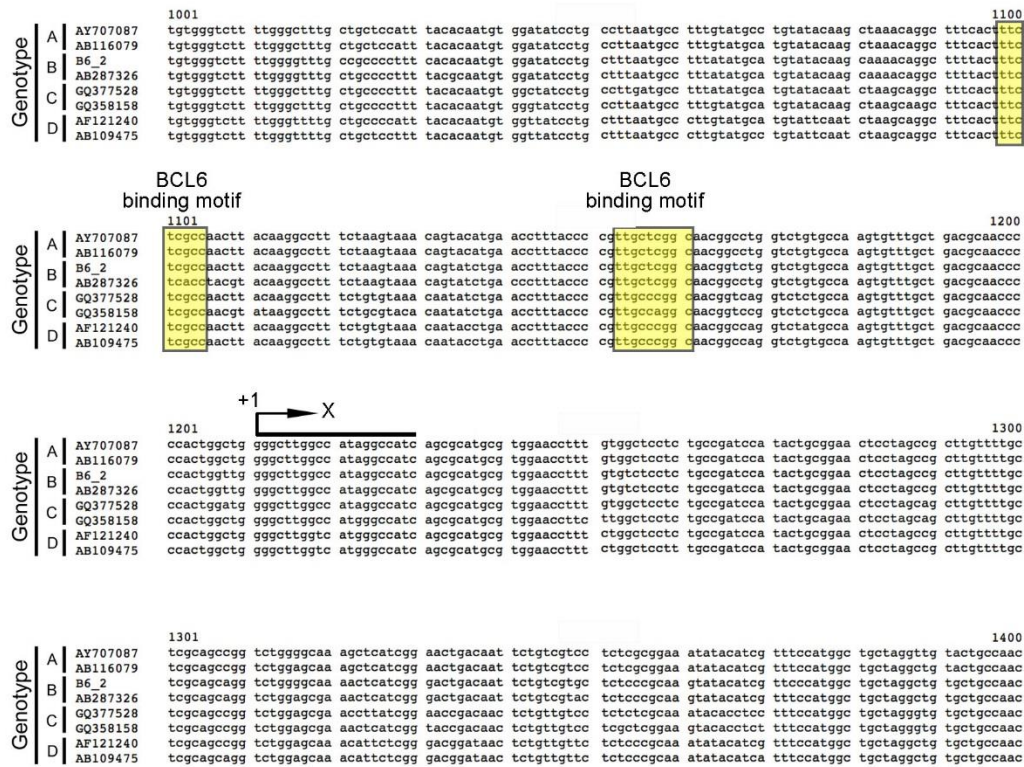

**Supplementary Figure S4.** The putative BCL6 binding sites were found in the X promoter and downstream regions of four genotypes of HBV. The sequences in the X promoter region (nt 1001- nt 1400) of two representative clones for HBV genotypes A, B, C and D were extracted from NCBI data base and aligned. The putative BCL6 binding sites are indicated by the yellow boxes; +1 indicates the transcription start site.

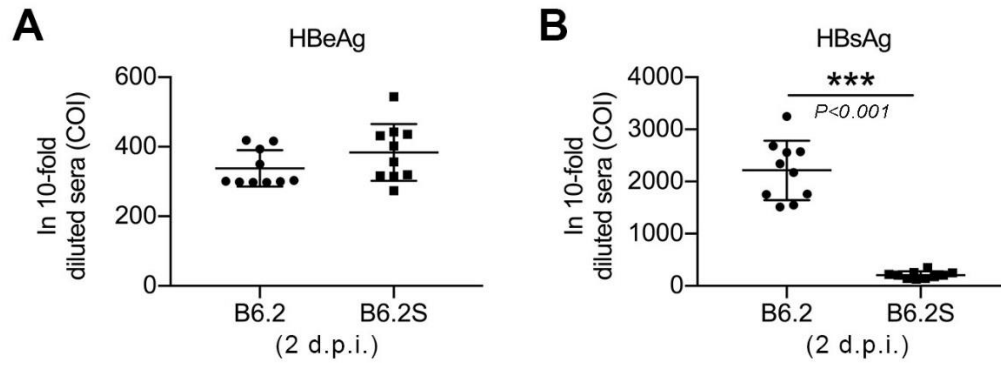

**Supplementary Figure S5.** B6.2S secretes much lower levels of HBsAg than B6.2 into serum. (A) The serum levels of HBeAg measured on day 2 post-DNA injection showed that the HDI efficiencies between the B6.2 and the B6.2S groups were comparable. (B) The serum levels of HBsAg in the B6.2S group were much lower than those in the B6.2 group. \*\*\* $P < 0.001$ , the Student's  $t$ -test.

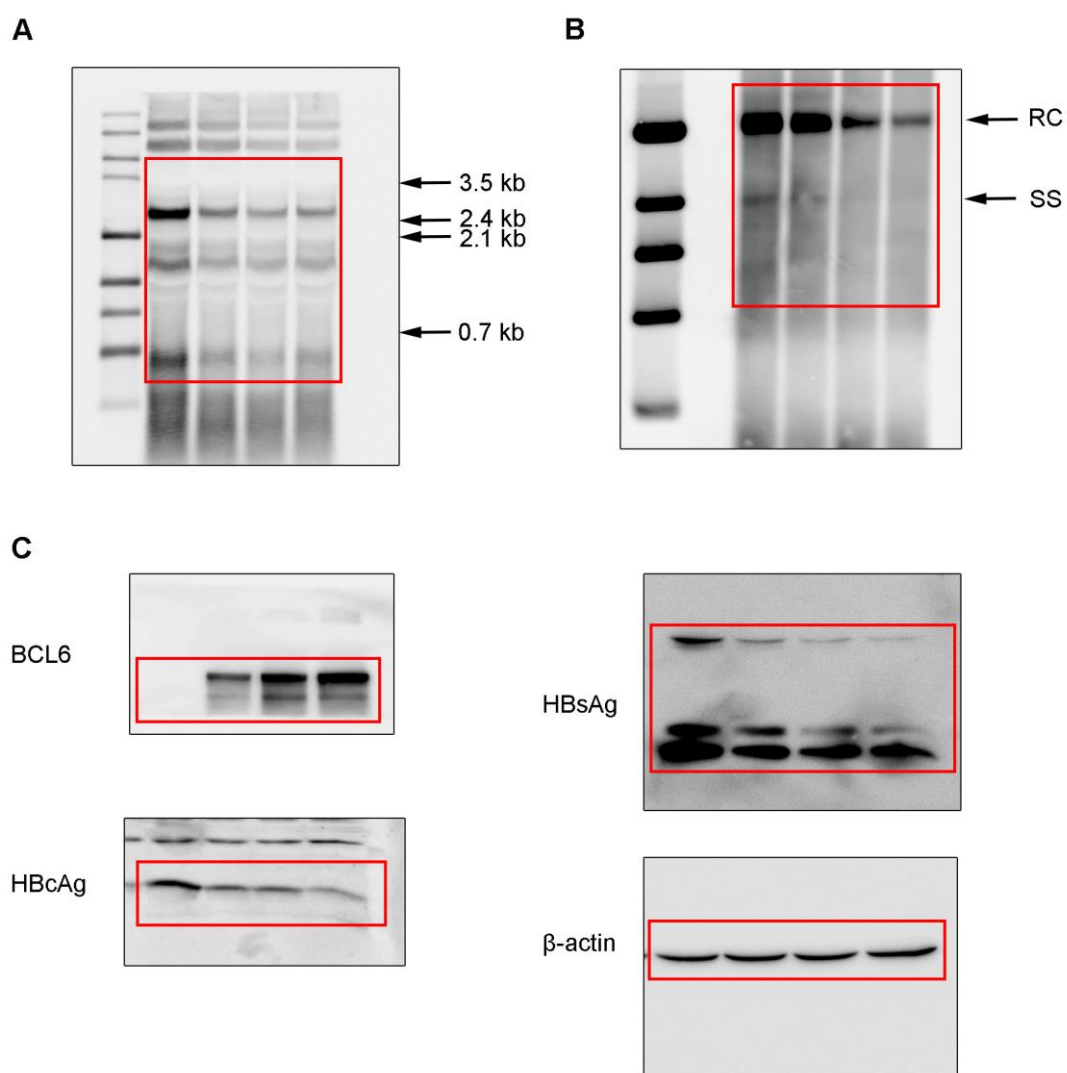

**Supplementary Figure S6. Original blot images**

(A) For Figure 5B. (B) For Figure 5D. (C) For Figure 5E.

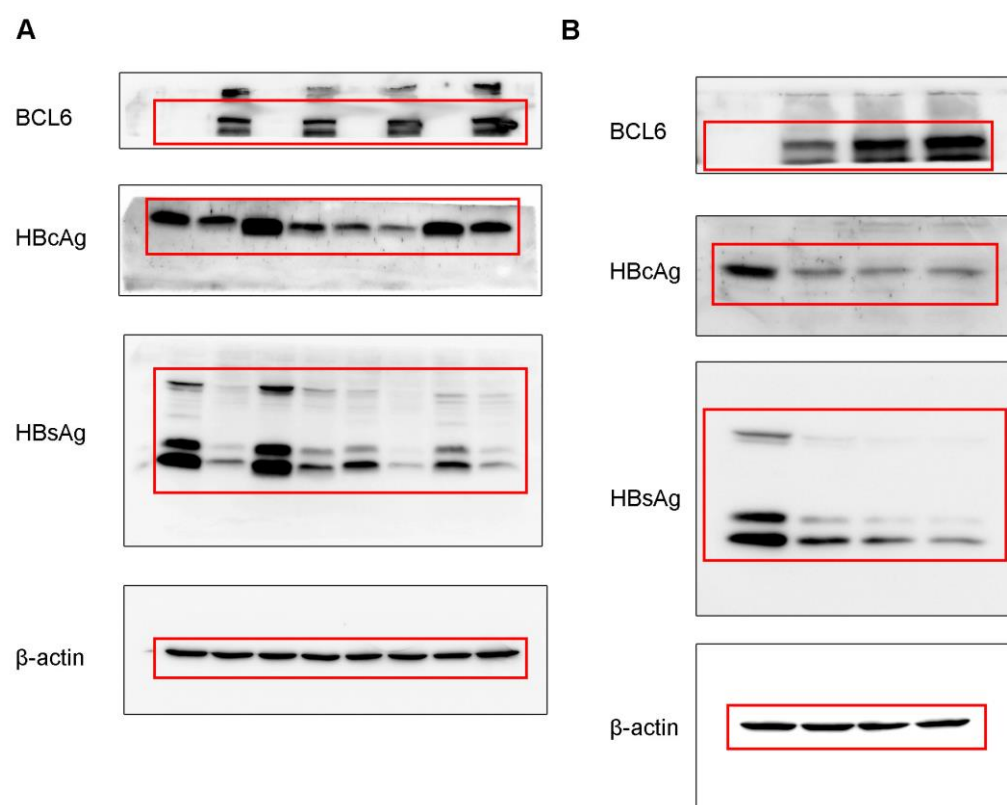

**Supplementary Figure S7. Original blot images**

(A) For Figure 6B. (B) For Figure 6D.
